# Supplementary material for: Gold Nanoclusters Grown on MoS2 Nanosheets by Pulsed Laser Deposition: An Enhanced Hydrogen Evolution Reaction
Source: MDPI journal article supplement (doi:10.3390/molecules26247503), 2021-12-11
Supplement: s1 [file s1]

## Supporting information

### Gold Nanoclusters Grown on MoS<sub>2</sub> Nanosheets by Pulsed Laser

#### Deposition: An Enhanced Hydrogen Evolution Reaction

Yuting Jing<sup>#1</sup>, Ruijing Wang<sup>#1</sup>, Qiang Wang<sup>\*2</sup>, Xuefeng Wang<sup>\*1</sup>

<sup>1</sup>Shanghai Key Lab of Chemical Assessment and Sustainability, School of Chemical Science and Engineering, Tongji University, Shanghai 200092, China

E-mail: xfwang@tongji.edu.cn; Fax: +86-21-65981097; Tel: +86-21-65981097

<sup>2</sup> State Key Laboratory of Coal Conversion, Institute of Coal Chemistry, Chinese Academy of Sciences, Taiyuan 030001, Shanxi, China

E-mail: wqiang@sxicc.ac.cn

<sup>#</sup>These authors contributed equally to this work.

**Table S1** The atom percentage (at. %) of Au, Mo, S element in the Au/MoS<sub>2</sub>/Ti with different Au deposition time.

| Element/Time | 1 min | 3 min | 5 min | 10 min |
|--------------|-------|-------|-------|--------|
| Ti K         | 9.87  | 1.33  | 13.06 | 5.41   |
| O K          | 12.55 | 12.02 | 14.05 | 18.55  |
| S K          | 53.03 | 58.99 | 49.16 | 47.39  |
| Mo L         | 23.67 | 26.55 | 22.20 | 25.30  |
| Au M         | 0.87  | 1.11  | 1.53  | 3.35   |

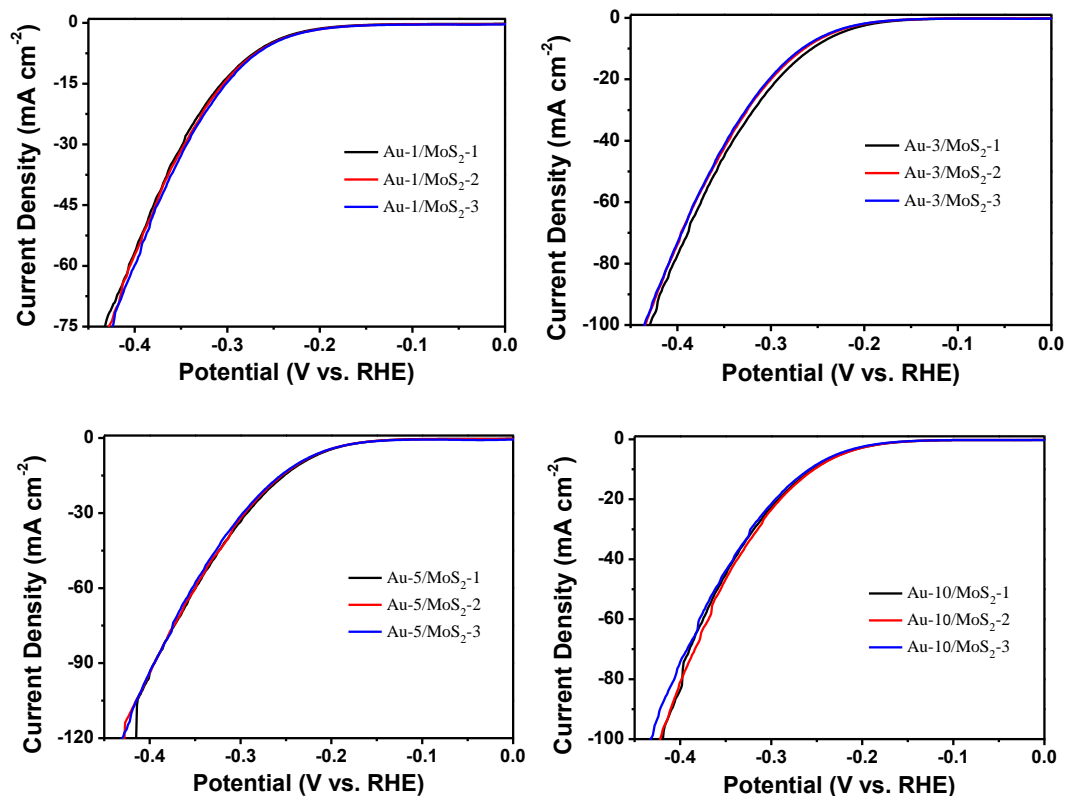

**Figure S1** The LSV curves of the Au/MoS<sub>2</sub> with different Au deposition time in the parallel experiment.

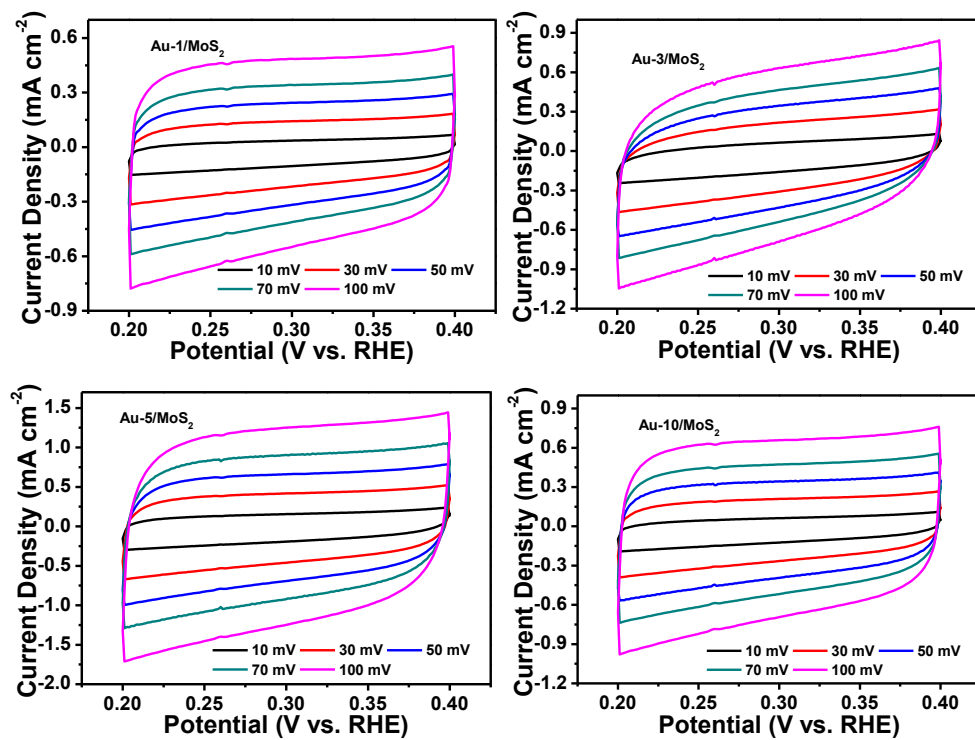

**Figure S2** The CV curves of the Au/MoS<sub>2</sub>/Ti with different Au deposition time.
